# Supplementary material for: Enhanced charge transportation in a polypyrrole counter electrode via incorporation of reduced graphene oxide sheets for dye-sensitized solar cells
Source: Royal Society of Chemistry journal article supplement (doi:10.1039/c2cp42790g), 2012-11-12
Supplement: c2cp42790g.pdf [file c2cp42790g.pdf]

## Electronic Supplementary Information (ESI)

# Enhanced Charge Transportation in Polypyrrole Counter Electrode via Incorporation of Reduced Graphene Oxide Sheets for Dye-Sensitized Solar Cells

Feng Gong, Xin Xu, Gang Zhou and Zhong-Sheng Wang\*

*Department of Chemistry & Lab of Advanced Materials, Fudan University, 2205  
Songhu Road, Shanghai 200438, PR China.*

\* Corresponding author: E-mail: zs.wang@fudan.edu.cn, Fax/Tel: +86-21-5163-0345

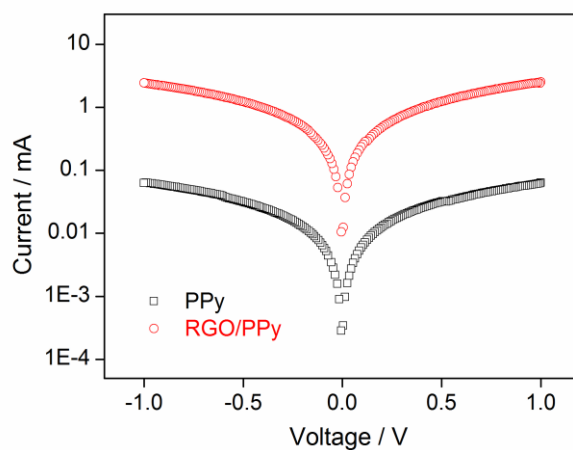

Figure S1 Semilogarithmic current-voltage curves for the PPy and RGO/PPy pressed samples.

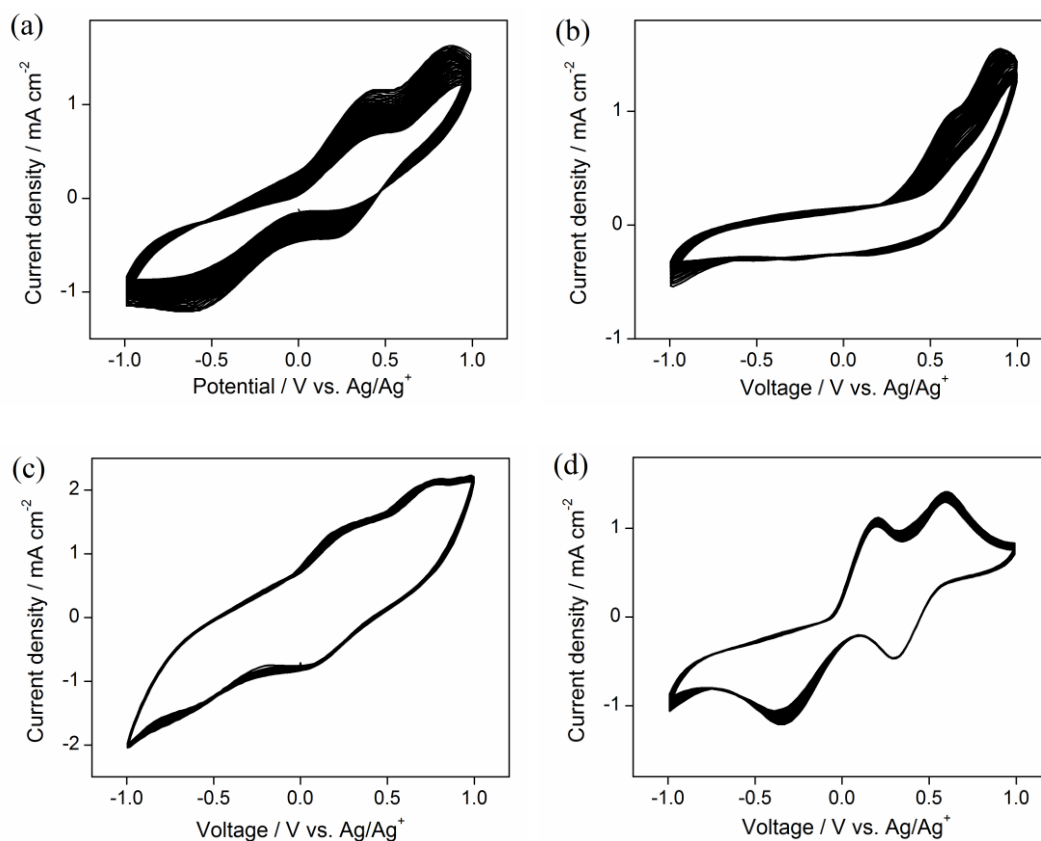

**Figure S2.** Consecutive 50 cyclic voltammograms for (a) PPy, (b) RGO, (c) RGO/PPy, and (d) Pt electrodes. The acetonitrile based electrolyte contains 0.1 M LiClO<sub>4</sub>, 10 mM LiI, and 1 mM I<sub>2</sub>, and the scan rate is 50 mV s<sup>-1</sup>. A platinum wire and an Ag/Ag<sup>+</sup> electrode were used as counter electrode and reference electrode respectively.

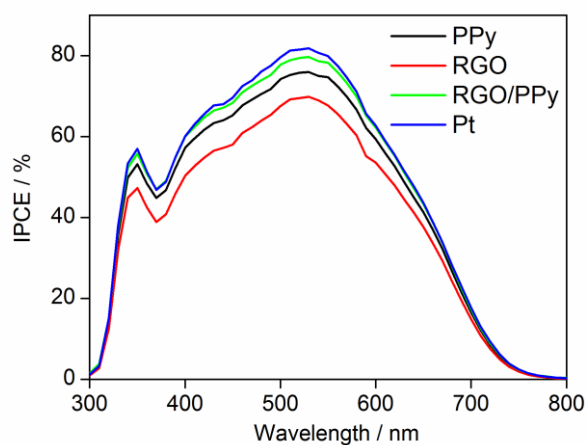

**Fig. S3.** IPCE spectra of DSSCs with different CEs.
